# A theory that predicts behaviors of disordered cytoskeletal networks

Julio Belmonte<sup>1,2</sup>, Maria Leptin<sup>1</sup> and François Nédélec<sup>2,\*</sup>

<sup>1</sup>Directors's Research/Developmental Biology Unit, European Molecular Biology Laboratory,  
Meyerhofstrasse 1, 69117 Heidelberg, Germany

<sup>2</sup>Cell Biology and Biophysics Unit, European Molecular Biology Laboratory, Meyerhofstrasse 1,  
69117 Heidelberg, Germany

\*Correspondence: nedelec@embl.de

## SUMMARY

Morphogenesis in animal tissues is largely driven by tensions of actomyosin networks, generated by an active contractile process that can be reconstituted *in vitro*. Although the network components and their properties are known, the requirements for contractility are still poorly understood. Here, we describe a theory that predicts whether an isotropic network will contract, expand, or conserve its dimensions. This analytical theory correctly predicts the behavior of simulated networks consisting of filaments with varying combinations of connectors, and reveals conditions under which networks of rigid filaments are either contractile or expansile. Our results suggest that pulsatility is an intrinsic behavior of contractile networks if the filaments are not stable but turn over. The theory offers a unifying framework to think about mechanisms of contractions or

23 expansion. It provides a foundation for the study of a broad range of processes  
24 involving cytoskeletal networks, and a basis for designing synthetic networks.

25

## 26 INTRODUCTION

27 Networks of cytoskeletal filaments display a variety of behaviors. A decisive  
28 feature for the physiological role of networks is whether they contract or expand.  
29 For instance, actomyosin cortices can contract, and the tensions thus created  
30 determine the morphology of animal cells (Sanchez et al., 2011). Conversely, the  
31 mitotic spindle at anaphase is a network of microtubules that extends to segregate  
32 the chromosomes. Such behaviors are essential, but we still lack an intuitive  
33 understanding of how they come about, as it is difficult to extrapolate between the  
34 microscopic level, where filaments are moved by molecular motors and restrained  
35 by crosslinking elements, and the level of the entire system. Cytoskeletal filaments  
36 and many of their associated factors are well characterized biochemically. With  
37 sufficient knowledge of the relevant properties of the components of a particular  
38 network, it should be possible to predict the network behavior. Traditional  
39 approaches were particularly successful in predicting passive systems composed of  
40 reticulated polymers (Wolff and Kroy, 2012), and more recent developments in  
41 active gel theories address networks containing molecular motors (Prost et al.,  
42 2015). These latter theories however cannot explain the contractile or expansile  
43 nature of the network, as it arises from microscopic interactions that are not

44 represented in the theory. To understand why contractility occurs, one must  
45 describe the system at higher resolution, and consider motors and filaments  
46 explicitly (Carlsson, 2006; Kruse and Jülicher, 2000; Lenz and Gardel, 2012;  
47 Liverpool et al., 2009; Liverpool and Marchetti, 2003; Ziebert et al., 2009). Small  
48 networks can also be studied with computer simulations (Bidone et al., 2017;  
49 Ennomani et al., 2016; Hiraiwa and Salbreux, 2016; Mendes Pinto et al., 2012; Oelz  
50 et al., 2015), but we miss a simpler approach that can make rapid predictions purely  
51 based on analytical deduction. Such a theoretical framework would be particularly  
52 valuable to classify the different behaviors that are seen experimentally. In search  
53 for such a general theory, we chose initially to concentrate on the major factor  
54 determining contraction of networks, that is the force created by molecular motors,  
55 although we recognized that filament shortening could also lead to contractility  
56 (Backouche et al., 2006; Mendes Pinto et al., 2012; Oelz et al., 2015). *In vitro*  
57 experiments have shown that contractility can arise with stabilized filaments. In such  
58 experiments, the filaments are initially distributed randomly, and molecular motors  
59 or crosslinkers added to the mixture make random connections between  
60 neighboring filaments. The active motions of molecular motors then drive network  
61 evolution. With microtubules and kinesin oligomers, static patterns such as asters  
62 (Köhler et al., 2011; Nedelec et al., 1997) or dynamic beating patterns (Katoh et al.,  
63 1998; Sanchez et al., 2011; Takiguchi, 1991; Thoresen et al., 2011) can arise. While  
64 radial (Backouche et al., 2006) and other patterns (Köhler et al., 2011) were also

65 observed with actin, F-actin networks activated with myosin are predominantly  
66 contractile, as demonstrated in various geometries: bundles (Kato et al., 1998;  
67 Takiguchi, 1991; Thoresen et al., 2011), rings (Reymann et al., 2012), planar  
68 networks (Murrell and Gardel, 2012), spherical cortices (Carvalho et al., 2013; Shah  
69 et al., 2014; Vogel et al., 2013) or 3D networks (Bendix et al., 2008; Koenderink et  
70 al., 2009). Microtubule networks with NCD or dynein motors are also contractile  
71 (Foster et al., 2015; Surrey et al., 2001). Several interesting mechanisms of  
72 contraction have been proposed and reviewed recently (Murrell et al., 2015;  
73 Salbreux et al., 2012), but each of these applies only to a particular system for which  
74 it explains the behavior. We propose here a theory that describes general principles  
75 of contractility and that can be applied to both microtubule and actin systems. We  
76 also illustrate that contractile systems become pulsatile if filament turnover is  
77 introduced in the model.

78

## 79 **RESULTS**

### 80 **A Simple Theory Predicts the Behavior of Random Networks**

81 Let us consider a disorganized set of filaments connected by active and  
82 passive “connectors” made of two functional subunits (Fig. 1A, B). Possible passive  
83 connectors are crosslinkers such as Ase1, Plastin, alpha-Actinin or Filamin, whereas  
84 active connectors are oligomeric motors such as Myosin mini-filaments, Dynein  
85 complexes, bivalent motors such as Kinesin-5 or Myosin VI. By walking along

86 filaments, bridging motors move the filaments relative to each other and change  
87 the network. It is however not obvious *a priori* how the sum of their local effects will  
88 influence the overall shape and size of the network. A computer can be used to  
89 simulate the dynamics of a network, but because all biochemical parameters must  
90 be specified in a simulation, only a finite set of conditions can be tested. We present  
91 here an analytical theory that overcomes this limitation. Active networks have been  
92 previously analyzed (Gowrishankar et al., 2012; Lenz, 2014; Liverpool and  
93 Marchetti, 2003; Nedelec et al., 1997; Ziebert et al., 2007) by considering pairs of  
94 filaments with one active connector (Fig. 1C). This approach is valid for sparsely  
95 connected networks in which only a few motors are active, but physiological  
96 networks must be well connected to exert force. In other words, the network should  
97 be elastically percolated, and there must exist continuous paths through which  
98 tension can be transmitted between any pair of distant points (Dasanayake et al.,  
99 2011). Specifically, we assumed that filaments are connected to at least two other  
100 filaments of the network. Focusing on one of these filaments (Fig. 1D), we see that  
101 the section of the filament between two connectors acts as a mechanical bridge  
102 between two points of the network. If the connectors are immobile, or if they both  
103 move in the same direction at the same speed, their distance remains constant, the  
104 section of the filament between them does not change in length, and the bridge is  
105 neutral (Fig. 1E). By contrast, if the two connectors move towards each other, the

106 bridge exerts a contractile stress, whereas if they move apart, this produces an  
107 expansile stress (Fig. 1E).

108 To predict if the whole network will contract or expand, we sum up the effects  
109 of all mechanical bridges in the network. To do this, we first list all the possible  
110 configurations for two connector subunits bound to a filament (shown below for  
111 two specific examples). For each configuration, we then calculate  $da/dt$ , where  $a$  is  
112 the distance between the two connectors measured along the filament. This  
113 quantity ( $v_i = \frac{da}{dt}$  for configuration  $i$ ) follows from the relative movements of the  
114 bound subunits of the connectors. When we sum all the contributions, we take into  
115 account the probability  $p_i$  of each configuration to occur ( $\sum_i p_i v_i$ ), which can be  
116 calculated from the concentrations of components in the system, the binding and  
117 unbinding rate of the subunits, and other characteristics of the network (see  
118 Supplemental Information). We also distinguish the case where the filaments are  
119 rigid and can support expansile stress from the case where the filaments are flexible  
120 such that they buckle under compression. In the latter case, filament buckling spoils  
121 part or all of the expansile forces (Fig. 1E), and we thus discard the contribution of  
122 these expansile configurations. The summation of the weighted contributions of all  
123 configurations can then be carried out algebraically, and the sign of the result  
124 indicates the predicted network behavior.

125

126 **Actomyosin Networks with Motors and Crosslinkers**

127 To develop the theory, we first applied it to a much studied model of  
128 cytoskeletal activity, that of actomyosin contraction, which has also been  
129 reconstituted *in vitro* (Carvalho et al., 2013; Kato et al., 1998; Koenderink et al.,  
130 2009; Mizuno et al., 2007; Murrell and Gardel, 2012; Reymann et al., 2012; Shah et  
131 al., 2014; Takiguchi, 1991; Thoresen et al., 2011; Vogel et al., 2013). Actomyosin  
132 networks consist of stabilized F-actin filaments and two types of connectors:  
133 bivalent motors moving at speed  $v$  and passive crosslinkers (Fig. 2A). The  
134 crosslinker is composed of two identical subunits that may bind anywhere on the  
135 filaments, and that remain immobile until they detach. There are four possible ways  
136 to arrange the two types of connectors on a filament (Fig. 2A). Their likelihood  
137 depends on  $P_M$  and  $P_C$ , the probability of one or more motors and the probability  
138 of one or more crosslinkers being bound at an intersection of filaments,  
139 respectively. Two of the configurations are neutral in outcome: those with two  
140 motors and those with two crosslinkers. The other configurations are active and  
141 involve a motor and a crosslinker (Fig. 2A). There are two symmetric configurations  
142 with opposite outcomes. In one, the motor and the crosslinker approach each other  
143 at speed  $-v$ , and in the other they move apart at speed  $v$ . They have an equal  
144 likelihood that is proportional to  $P_M P_C (1 - P_C)$ , reflecting that one of the crossings  
145 should have at least one motor and no crosslinkers, with a likelihood  $P_M (1 - P_C)$ ,  
146 while the second crossing should have at least a crosslinker, with or without motor,  
147 carrying a likelihood  $P_C$ . The net sum over the effects of all configurations in this

148 example is null, and this predicts that a system made of rigid filaments that remain  
149 straight should neither contract nor expand. Contractile and expansile  
150 configurations cancel each other out, as found previously in the case where only  
151 motors were considered (Kruse and Jülicher, 2000). If the filament buckles,  
152 however, the expansile configuration will not be able to drive network expansion  
153 (Fig. 1E, last panel). Whether a filament buckles depends on the rigidity of the  
154 filament, the amount of force generated by the motors, and the distance  $a$  between  
155 the connectors. Under conditions in which the filaments always buckle, there are no  
156 expansile configurations, and the net sum is  $-P_M P_C (1 - P_C) v$ . In this simple case,  
157 the sign reveals that the system is contractile, and this is correctly recapitulated in  
158 simulations, for example, when filaments are set to be very flexible (rigidity = 0.01  
159  $\text{pN } \mu\text{m}^2$ ) (Fig. 2BD and Movies 1 to 4).

160

### 161 **Networks of Semi-Flexible Filaments Contract at Predicted Rates**

162 If the filaments are semi-flexible, which is the case for F-actin, with a rigidity  
163 of  $0.075 \text{ pN } \mu\text{m}^2$ , the contribution of expansile configurations may not always be  
164 negligible, since a filament may or may not buckle depending on the length over  
165 which it is compressed. Therefore, to be able to predict the behavior of a network,  
166 it is necessary to know the conditions under which filaments buckle.

167 For an empirical assessment of this effect, we thus simulated networks in  
168 which the length and density of the filaments, and the number of crosslinkers and



169 molecular motors were systematically varied. For this, we used Cytosim, an Open  
170 Source simulation engine that is based on Brownian Dynamics (Nedelec and  
171 Foethke, 2007). In brief, each filament is represented by a set of equidistant points,  
172 subject to bending elasticity (Fig. 3A). Crosslinkers and motors are represented by  
173 diffusing point-like particles, which bind stochastically to neighboring filaments  
174 (Fig. 3CD). Connectors with a stiffness  $k$  are formed when motors or crosslinkers are  
175 bound with their two subunits (Fig. 3E). The movement of motors follows a linear  
176 force-speed relationship (Fig. 3F). For simplicity, the unbinding rate is constant for  
177 this study, and a motor reaching the end of a filament immediately unbinds (Fig.  
178 3G). Given a random network as initial condition, Cytosim simulates the movement  
179 of all the filaments in the system, and a contraction rate is extracted automatically  
180 (Supplemental Information C).

181 Guided by the results of many simulations, we concluded that network  
182 contraction depends on the ratio between the mesh size  $L_1$  and the threshold  
183 distance  $d_0$  above which buckling occurs, which in turn can be calculated from the  
184 filament rigidity and the maximum force exerted by the motor (Supplemental  
185 Information D). If  $L_1 < d_0$ , then any filament segment of length  $d_0$  will be intersected  
186 by  $\beta_0 = d_0/L_1$  filaments. If any of these intersections is bridged by a crosslinker, this  
187 fixes the filament laterally and prevents it from buckling under the force of the  
188 motor(s) and crosslinker positioned at its ends. From these considerations, we can  
189 calculate the probability for a filament segment to buckle as  $P_M P_C (1 - P_C)^{\beta_0}$  (Fig.

190 2C), where  $(1 - P_C)^{\beta_0}$  is the probability that none of the intersections between the  
191 motor and the crosslinkers are bridged by a crosslinker (Supplemental Information  
192 D). The theory predicts a dependence of the contraction rate on the number of  
193 connectors for a variety of conditions (Fig. S12–S14). For cases where the density  
194 of filaments is low, the contraction rate also depends on the contribution from a  
195 mechanism that has been anticipated long ago (Weisenberg and Cianci, 1984). In  
196 this configuration (Fig. 7H), a motor acts on an intersection that is already  
197 connected by a crosslinker, producing a contractile force by ‘zippering’ two  
198 filaments. For a network containing bivalent motors and bivalent crosslinkers, the  
199 dependence of contractility on the number of these connectors is thus predictable  
200 from first principles.

201

## 202 **Networks of Rigid Filaments Can Contract or Expand**

203 We next explored systems composed of rigid filaments such as microtubules.  
204 Because some molecular motors are associated with microtubule ends in nature,  
205 we investigated the behavior induced by connectors comprised of motors and end-  
206 binding subunits (Fig. 4). As predicted by the theory (Fig. 4A), the simulations  
207 showed that the system is expansile if plus-end directed motors are combined with  
208 minus-end binding subunits (Fig. 4B, Movie 5), and contractile if plus-end directed  
209 motors are associated with plus-end binding subunits (Fig. 4C, Movie 6). A system  
210 composed of these two types of connectors can be either contractile or expansile

211 depending on the relative concentrations of the connectors (Fig. 4DE, Movie 7).  
212 This reveals exciting avenues for the development of synthetic materials (Henkin et  
213 al., 2014) that could be tuned to be expansile or contractile. Using light-switchable  
214 molecular motors (Nakamura et al., 2014) would be particularly exciting in this  
215 respect.

216

### 217 **The Effects of Many Combinations of Connectors is Predicted**

218 To probe the general applicability of the theory, we simulated networks with  
219 mixtures of connectors containing 5 different types of subunits (Fig. 1B). A subunit  
220 can bind, and then either remain bound at the initial position, or move. Non-moving  
221 binders may be of a type that can bind anywhere on the filament, or they may be  
222 restricted in their binding to a region near the plus or the minus end. Moving  
223 elements (motors) can bind anywhere, but can be of two types, those moving to the  
224 plus and those moving to the minus end. By combining any two of these subunits,  
225 one can make 15 types of connectors. Simulated networks containing any one type  
226 of connector all behaved as predicted by the theory (see examples on Fig. 5A). We  
227 also simulated systems containing two different types of connectors (in equal  
228 quantities), both for flexible and rigid filaments. There are 210 possible  
229 combinations, and for every one of them, the simulations closely matched the  
230 prediction of the theory (Fig. 5BC, see Supplemental Information for details of the  
231 calculation). Many types of molecular elements that are found in nature, such as

232 end-binding proteins, have not been used in reconstituted networks, but we can  
233 now predict what their effects on a network should be.

234

### 235 **Heterogeneous systems composed of different types of filaments**

236 So far, we have considered systems made of one type of filament, but some  
237 networks *in vivo* contain different types of filaments. In particular myosin II motors  
238 are organized into thick antiparallel 'mini-filaments' with an average length of 300  
239 nm (Verkhovsky and Borisy, 1993). Networks such as the actomyosin meshwork of  
240 the cell cortex and the contractile actin cables in cells are thus heterogeneous  
241 systems in which F-actin filaments are mixed with mini-filaments, which are also the  
242 motors driving the system out of equilibrium. To probe if the theory could hold for  
243 such heterogeneous systems, we listed all the possible combinations of two  
244 connectors for the two types of filaments (Fig. 6A). Similar to the homogeneous  
245 case (Fig. 2) this analysis predicts that the system should be contractile if  
246 crosslinkers are also present, and neutral otherwise. We then simulated such a  
247 system of actin-like filaments and mini-filaments composed of a rigid backbone of  
248 length  $0.5\mu\text{m}$  with a motor subunit at each end. The results confirmed the predicted  
249 behaviors (Fig. 6B and 6C), suggesting that the theory can be applied to  
250 heterogeneous networks. It is tempting to think that the approach can also be  
251 extended to anisotropic networks if the probabilities of the configurations are  
252 calculated locally.

253

## 254 **Contractile Systems Pulse if Filaments Turn Over**

255         So far, we have considered systems made of filaments of fixed length that  
256 persist infinitely. Under these conditions, network contraction and expansion are  
257 non-reversible events, that only occur once. This is indeed what happens with most  
258 *in vitro* reconstituted cytoskeletal networks, obtained with stabilized filaments  
259 (Carvalho et al., 2013; Foster et al., 2015; Katoh et al., 1998; Murrell and Gardel,  
260 2012; Shah et al., 2014; Surrey et al., 2001; Takiguchi, 1991; Thoresen et al., 2011;  
261 Vogel et al., 2013). But how does this relate to networks *in vivo*, which manage to  
262 avoid such a collapse? The simulations described above do not perfectly mimic the  
263 situation *in vivo*, since cytoskeletal filaments elongate by self-assembly and if they  
264 remain dynamic will eventually vanish, such that both the length of the filaments,  
265 and their abundance are fluctuating quantities that can be regulated. In some cells,  
266 actomyosin networks persist for several minutes, and exhibit pulsatile behavior that  
267 is reminiscent of contractility (He et al., 2010; Martin et al., 2009; Munro et al., 2004;  
268 Solon et al., 2009). To test the relationship between this dynamic behavior and  
269 contractility, we extended our simulations to include filament turnover. Specifically,  
270 to implement an average lifetime  $T$  for the filament, we randomly selected and  
271 deleted one of the  $N$  filaments at a rate  $N/T$ , and replaced it with a new one placed  
272 at a random position (Fig. 6D). We typically observed that within  $3s < T < 200s$ , a  
273 configuration that was contractile without turnover now displayed pulsed

274 contractions (Fig. 6E, Movie 8). Note that these new simulations used periodic  
275 boundary conditions (PBC), because if the system is allowed to contract freely,  
276 pulses cannot be observed. Use of PBC imposes a constant surface on the system  
277 and thereby forces the network to build up tension. It corresponds best to a network  
278 that is attached at the cell boundaries, without requiring additional assumptions on  
279 the nature of the attachment. These results confirm earlier models that considered  
280 filament dynamics (Bidone et al., 2017) or turnover (Hiraiwa and Salbreux, 2016;  
281 Kumar et al., 2014), illustrating that with filament turnover, a system that was  
282 contractile otherwise can be pulsatile. As suggested by a coarse-grained model  
283 (Kumar et al., 2014), we wondered if pulsatility was a general consequence of  
284 turnover. We thus simulated networks with all the combinations of connectors that  
285 were contractile on Fig. 5B and varied systematically the filament turnover rate. All  
286 displayed pulsatile behavior, confirming the universal nature of the phenomenon  
287 (data not shown).

288

## 289 **DISCUSSION**

290 The theory we present here predicts the initial evolution of a network from  
291 the properties of its connectors. We have confirmed these predictions with  
292 simulations for all tested conditions. The model implemented in the simulation is  
293 intentionally minimalistic, as subunit binding, unbinding and filament turnover  
294 occurred at constant rates and independently of other events. All simulations where

295 done in 2D, and did not consider steric interactions between the filaments, which  
296 in 2D would induce artifacts. We expect our theoretical arguments to hold also for  
297 other types of networks such as filament bundles or 3D networks. However, the  
298 calculation presented in the supplemental information depends on the geometry  
299 of the network, and would need to be revised to apply to these different conditions.  
300 Our analytical prediction of network behavior was based on the characteristics of  
301 the connectors but did not include physical parameters such as the viscosity of the  
302 medium. Rather than an absolute contraction rate, this theory predicts the relative  
303 contraction rates of two networks when the parameters of the connectors (numbers,  
304 types, binding rates, unbinding rates) are different between them. Such a  
305 prediction is immediately valuable, as it can be readily tested experimentally by  
306 systematically varying the concentration of both motors and crosslinkers in  
307 reconstituted *in vitro* networks.

308 For a system containing crosslinkers and bivalent motors (Fig. 2), our analysis  
309 indicates that the 'active' contractile configurations involve both a crosslinker and a  
310 motor. We thus expect these two types of activities always to be found in a  
311 contractile system. However, we note that in an *in vitro* experimental system, the  
312 assumedly pure preparation of motors that is added may in fact contain damaged  
313 'dead' motor proteins that act as passive connectors. Nevertheless, addition of  
314 crosslinkers indeed dramatically enhances the effect of myosin, a phenomenon  
315 observed more than 50 years ago (Ebashi and Ebashi, 1964). For 2D networks (Fig.

316 2CD and Supplemental Information), we could explain why the maximum  
317 contractility is obtained *in vitro* with approximately equal amounts of motors and  
318 crosslinkers (Bendix et al., 2008; Ennomani et al., 2016; Köhler and Bausch, 2012).  
319 Our theory also explains that under the action of myosin VI, a branched network  
320 made with Arp2/3, which represents an example of a connector combining end-  
321 binding and side-binding activities together, is more contractile than a network  
322 connected by crosslinkers binding anywhere along the filaments (Ennomani et al.,  
323 2016). This is because, as myosin VI is directed to the pointed end, the configuration  
324 involving a crosslinker bound to the pointed end (Arp2/3) is always contractile.  
325 Thus, at equal levels of connectivity, a network made with Arp2/3 is more  
326 contractile than a network made with a non-specific crosslinker, and less contractile  
327 than a network made with only end-to-end crosslinkers.

328       Because we focused on the initial behavior of a network, it seemed justified  
329 to ignore mechanisms that regulate the characteristics of the cell cortex, for instance  
330 its thickness. We used however simulations to explore the effects of filament  
331 turnover (Fig. 6DE). The fact that introducing filament turnover was sufficient to  
332 induce pulsing in all the contractile scenarios leads to the surprising conclusion that  
333 pulsatility is an intrinsic behavior of contractile networks of non-stable filaments,  
334 and that no other external elements are necessary. This of course does not mean  
335 that in the natural biological situation there may not be regulatory elements  
336 superimposed on the underlying mechanism that suppress or enhance pulsing



337 (Nishikawa et al., 2017). Pulsing is seen only over a certain range of filament  
338 lifetimes (Fig. 6D), indicating that one such regulatory input could be via the  
339 stability of filaments: for example, stabilizing filaments should, according to our  
340 simulations, arrest pulsing, and the ability of myosin to destroy filaments (Matsui et  
341 al., 2011) could on the contrary enhance pulsing. The characteristics of the pulses  
342 can be further tuned by modulating the other characteristics of the network  
343 components, as has also been seen *in vivo* for the regulation of myosin (Munjal et  
344 al., 2015). Pulses may be a desired feature or an inevitable consequence of having  
345 filament turnover when the connectors lead to contractility. This important feature  
346 of *in vivo* cytoskeletal networks deserves more investigation in the future.

347       Importantly, our theory unifies ideas previously proposed for various  
348 biological systems, and we will discuss now how various mechanisms giving rise to  
349 contraction or extension fit within the new theory (Fig. 7).

350       In the sarcomeres found in striated muscles, myosin II mini-filaments pull on  
351 filaments arranged in an anti-parallel manner (Fig. 7A). This system can be seen as  
352 containing two types of connectors: a passive one linking the barbed ends of the  
353 filament, and a motor directed towards the barbed end. Three possible  
354 combinations can be made with these two connectors (Fig. 7, right column). In the  
355 absence of any expansile configuration, the system is bound to always be  
356 contractile. A sarcomeric system is highly ordered, but less organized systems  
357 made of the same subunits, for example bipolar filaments that are discussed for

358 smooth muscles (Fig. 7B) or a fully disorganized system (Fig. 5A, fourth column) are  
359 also contractile.

360 For a system in which the crosslinkers are not restricted to binding to the  
361 filament ends, but can bind anywhere along the length (Fig. 7C) both contractile  
362 and expansile configurations arise. Following the discussion on how buckling  
363 promotes contraction of a disorganized actin network (Liverpool et al., 2009;  
364 Mizuno et al., 2007) we argued that buckling can spoil some of the expansile  
365 configurations, tipping the balance in favor of contraction.

366 One popular mechanism to explain the contraction of microtubule networks  
367 (Fig. 7D) does not require filament bending, but involves a motor that has an affinity  
368 for the end of the filaments (Hyman and Karsenti, 1996; Nedelec et al., 1997).  
369 Because the motor walks towards the end, where it may be transiently trapped,  
370 configurations are contractile or neutral, but never expansile, and the entire  
371 network itself is therefore contractile (Foster et al., 2015). Looking at the set of  
372 configurations (Fig. 7, right column), the similarity of this mechanism with  
373 sarcomeric contractility (Fig. 7AB) is noticeable. In the case of the end-dwelling  
374 motor, however, the same molecular type is involved in generating the active and  
375 neutral end-binding connections.

376 Although we did not consider filament disassembly in this study, we would  
377 suggest that the theory can be applied also to this situation. For example, a  
378 molecule that tracks and remains bound to the depolymerizing end of a filament

379 (Fig. 7E) will reduce the distance between itself and a connector located elsewhere  
380 on the filament, thereby creating a pulling force. By calculating the likelihood of  
381 such a configuration, one may be able to predict the overall contractility of the  
382 network. We also did not consider filament elongation, which is a prominent  
383 mechanism by which actin networks expand, but identify conditions where, even  
384 without this mechanism, a network can increase its surface area.

385 A system with expansile configurations will extend if the filaments are  
386 sufficiently rigid to resist buckling, which is more likely to be the case for  
387 microtubules than for actin. A mitotic spindle is a complicated structure, which can  
388 be found in multiple states. In most cells metaphase corresponds to a steady state  
389 in which contractile contributions must on average compensate expansile ones. In  
390 *Xenopus laevis*, contraction is driven by the motor minus-end directed Dynein  
391 (Foster et al., 2015) while expansion is driven by the plus-end motor Kinesin5  
392 (Needleman and Brugués, 2014). When anaphase is induced, this balance is broken  
393 leading to spindle elongation, and chromosome segregation. For the sake of the  
394 argument, we consider here that the spindle at anaphase is purely driven by  
395 kinesin5, and thus assume only two types of connectors (Fig. 7F): passive  
396 complexes containing the protein NuMA, which connect the minus-ends of  
397 microtubules at the spindle poles, and plus-end directed motors connecting  
398 adjacent, antiparallel microtubules. Since Kinesin5 walks away from the minus-  
399 ends, the configurations are symmetric to the sarcomeric systems (Fig. 7A), and

400 expand the anaphase spindle. A disorganized network made of the same  
401 connectors is also expansile (Fig. 4B).

402 Additional expansile microtubule systems can be found in blood platelets  
403 and their progenitor cells, the megakaryocytes. During pro-platelet generation, the  
404 microtubules assemble into bundles that elongate, and this elongation is  
405 dependent on the activity of the molecular motors Dynein (Patel, 2005). In the  
406 mature platelets, microtubules are organized into a closed circular bundle, and this  
407 bundle must be able to resist contractile forces as it pushes outward on the plasma  
408 membrane. It was recently reported that the microtubule ring elongates after  
409 platelet activation, in a manner that is dependent on microtubules motors, but we  
410 lacked until now a microscopic picture of the elongation mechanism (Diagouraga  
411 et al., 2014). Our systematic exploration of random networks (Fig. 5) suggests  
412 different scenarios that could explain why the system is expansile. Beyond the  
413 relevance to these *in vivo* systems, it will be exciting to follow these principles to  
414 create expansile networks of microtubules *in vitro*, since end-binders are available  
415 to synthetic biologists.

416 Finally, in a system where the symmetry provides an equal number of  
417 contractile and expansile configurations, any imbalance in the probabilities of these  
418 configurations may lead to overall contraction or expansion (Gao et al., 2015).  
419 Following this principle, we can suggest here an explanation for the expansile  
420 nature of *in vitro* networks (Sanchez et al., 2012). Particularly, if the motors are

421 sufficiently processive, they may run a distance that is comparable to the length of  
422 the filament, and in this case their distribution along the length of the filament will  
423 be non-uniform (Fig. 7G). This effect has been called the antenna effect (Varga et  
424 al., 2006), and arises as a consequence of the motility, in a situation where binding  
425 has the same probability at every position of the filament. A plus-end directed  
426 motor would accumulate towards the plus ends of microtubules (Fig. 7G). In the  
427 presence of crosslinkers, such an effect will increase the likelihood of the expansile  
428 configurations, and lower the likelihood of the contractile configurations, thus  
429 promoting expansion. It is interesting to note that even if the motors were directed  
430 towards the minus-end of microtubules, the antenna effect would still lead to a bias  
431 in favor of expansion. The net imbalance will depend on the biophysical properties  
432 of the motors (speed, unbinding rate), and the length of the microtubules, and  
433 could provide tunable expansibility for networks made *in vivo* with microtubules  
434 (Sanchez et al., 2012).

435 In conclusion, our theory offers a framework for elementary mechanisms of  
436 expansion or contraction. It is a starting point for further exploration, since in its  
437 current state, the theory does not explain all the phenomena observed in  
438 simulations. In particular, for very flexible filaments a configuration involving two  
439 connectors starting from the same point of contact between two filaments seems to  
440 contribute to contraction (Fig. 7H). In this case, the connectors can pull the network  
441 together, even though the distance between them is growing. This interesting

442 effect, which is analogous to a zipper, can only be understood by considering two  
443 filaments and two connectors, whereas our theory considered one filament and two  
444 connectors. Because this effect only contributes little in most cases (see  
445 Supplemental Information D5), the theory is still able to make accurate predictions,  
446 even for complex systems (Fig. 5BC). Mathematically, the theory could be  
447 understood as providing a first-order approximation of the exact contractile rate.

448 From the theoretical framework presented here, with its clear predictions,  
449 perhaps a classification of the different types of active networks found in nature will  
450 emerge. Our approach may also inspire novel avenues for synthetic filament  
451 networks with enhanced functionalities.

452

## 453 **AUTHOR CONTRIBUTIONS**

454 This work arose from regular discussions between the authors, which all have  
455 contributed significantly to the findings. All authors together wrote the article.

456

## 457 **ACKNOWLEDGMENTS**

458 We are thankful to EMBO and EMBL for support, in particular for its high-  
459 performance computing services. We thank members of the Leptin and Nedelec  
460 groups, particularly H. Turlier, S. Dmitrieff, M. Lera Ramirez and Y. Jeske, as well as  
461 S. Blandin, D. Gilmour, T. Hiiragi, J.-P. Shen, R. Prevedel and P. Lenart for critically  
462 reading the manuscript. J.M.B. is the recipient of an EMBL Interdisciplinary

463 Postdoctoral fellowship, which is co-funded by Marie Curie Actions of the European  
464 Commission.

465

## 466 REFERENCES

- 467 Backouche, F., Haviv, L., Groswasser, D., and Bernheim-Groswasser, A. (2006).  
468 Active gels: dynamics of patterning and self-organization. *Phys Biol* 3, 264-273.
- 469 Bendix, P.M., Koenderink, G.H., Cuvelier, D., Dogic, Z., Koeleman, B.N., Briehar,  
470 W.M., Field, C.M., Mahadevan, L., and Weitz, D.A. (2008). A quantitative analysis of  
471 contractility in active cytoskeletal protein networks. *Biophys J* 94, 3126-3136.
- 472 Bidone, T.C., Jung, W., Maruri, D., Borau, C., Kamm, R.D., and Kim, T. (2017).  
473 Morphological Transformation and Force Generation of Active Cytoskeletal  
474 Networks. *PLoS Comput. Biol.* 13, e1005277.
- 475 Carlsson, A.E. (2006). Contractile stress generation by actomyosin gels. *Phys Rev E*  
476 *Stat Nonlin Soft Matter Phys* 74, 051912.
- 477 Carvalho, K., Tsai, F.-C., Tsai, F.C., Lees, E., Voituriez, R., Koenderink, G.H., and  
478 Sykes, C. (2013). Cell-sized liposomes reveal how actomyosin cortical tension  
479 drives shape change. *Proc Natl Acad Sci USA* 110, 16456-16461.
- 480 Dasanayake, N.L., Michalski, P.J., and Carlsson, A.E. (2011). General mechanism of  
481 actomyosin contractility. *Phys Rev Lett* 107, 118101.
- 482 Diagouraga, B., Grichine, A., Fertin, A., Wang, J., Khochbin, S., and Sadoul, K.  
483 (2014). Motor-driven marginal band coiling promotes cell shape change during  
484 platelet activation. *J Cell Biol* 204, 177-185.
- 485 Ebashi, S., and Ebashi, F. (1964). A New Protein Factor Promoting Contraction of  
486 Actomyosin. *Nature* 203, 645-646.
- 487 Ennomani, H., Letort, G., Guérin, C., Martiel, J.-L., Cao, W., Nedelec, F., La Cruz,  
488 De, E.M., Théry, M., and Blanchoin, L. (2016). Architecture and Connectivity Govern  
489 Actin Network Contractility. *Curr Biol* 26, 616-626.
- 490 Foster, P.J., Fürthauer, S., Shelley, M.J., and Needleman, D.J. (2015). Active  
491 contraction of microtubule networks. *Elife* 4.
- 492 Gao, T., Blackwell, R., Glaser, M.A., Betterton, M.D., and Shelley, M.J. (2015).  
493 Multiscale modeling and simulation of microtubule-motor-protein assemblies.

- 494 Phys Rev E Stat Nonlin Soft Matter Phys 92, 062709.
- 495 Gowrishankar, K., Ghosh, S., Saha, S., C, R., Mayor, S., and Rao, M. (2012). Active  
496 remodeling of cortical actin regulates spatiotemporal organization of cell surface  
497 molecules. *Cell* 149, 1353-1367.
- 498 He, L., Wang, X., Tang, H.L., and Montell, D.J. (2010). Tissue elongation requires  
499 oscillating contractions of a basal actomyosin network. *Nat Cell Biol* 12, 1133-  
500 1142.
- 501 Henkin, G., DeCamp, S.J., Chen, D.T.N., Sanchez, T., and Dogic, Z. (2014). Tunable  
502 dynamics of microtubule-based active isotropic gels. *Philos Trans a Math Phys Eng*  
503 *Sci* 372.
- 504 Hiraiwa, T., and Salbreux, G. (2016). Role of Turnover in Active Stress Generation in  
505 a Filament Network. *Phys Rev Lett* 116, 188101.
- 506 Hyman, A.A., and Karsenti, E. (1996). Morphogenetic properties of microtubules  
507 and mitotic spindle assembly. *Cell* 84, 401-410.
- 508 Katoh, K., Kano, Y., Masuda, M., Onishi, H., and Fujiwara, K. (1998). Isolation and  
509 contraction of the stress fiber. *Mol Biol Cell* 9, 1919-1938.
- 510 Koenderink, G.H., Dogic, Z., Nakamura, F., Bendix, P.M., MacKintosh, F.C., Hartwig,  
511 J.H., Stossel, T.P., and Weitz, D.A. (2009). An active biopolymer network controlled  
512 by molecular motors. *Proc Natl Acad Sci USA* 106, 15192-15197.
- 513 Köhler, S., and Bausch, A.R. (2012). Contraction mechanisms in composite active  
514 actin networks. *PLoS ONE* 7, e39869.
- 515 Köhler, S., Schaller, V., and Bausch, A.R. (2011). Structure formation in active  
516 networks. *Nat Mater* 10, 462-468.
- 517 Kruse, K., and Jülicher, F. (2000). Actively contracting bundles of polar filaments.  
518 *Phys Rev Lett* 85, 1778-1781.
- 519 Kumar, K.V., Bois, J.S., Jülicher, F., and Grill, S.W. (2014). *Phys. Rev. Lett.* 112,  
520 208101 (2014) - Pulsatory Patterns in Active Fluids. *Physical Review Letters*.
- 521 Lenz, M., and Gardel, M. (2012). Requirements for contractility in disordered  
522 cytoskeletal bundles - Abstract - *New Journal of Physics* - IOPscience. *New Journal*  
523 *of Physics*.
- 524 Lenz, M. (2014). Geometrical Origins of Contractility in Disordered Actomyosin  
525 Networks. *Phys. Rev. X* 4, 041002.



- 526 Liverpool, T.B., Marchetti, M.C., Joanny, J.F., and Prost, J. (2009). Mechanical  
527 response of active gels. *Epl* 85, 18007.
- 528 Liverpool, T.B., and Marchetti, M.C. (2003). Instabilities of isotropic solutions of  
529 active polar filaments. *Phys Rev Lett* 90, 138102.
- 530 Martin, A.C., Kaschube, M., and Wieschaus, E.F. (2009). Pulsed contractions of an  
531 actin-myosin network drive apical constriction. *Nature* 457, 495-499.
- 532 Matsui, T.S., Kaunas, R., Kanzaki, M., Sato, M., and Deguchi, S. (2011). Non-muscle  
533 myosin II induces disassembly of actin stress fibres independently of myosin light  
534 chain dephosphorylation. *Interface Focus* 1, 754-766.
- 535 Mendes Pinto, I., Rubinstein, B., Kuchavy, A., Unruh, J.R., and Li, R. (2012). Actin  
536 depolymerization drives actomyosin ring contraction during budding yeast  
537 cytokinesis. *Dev Cell* 22, 1247-1260.
- 538 Mizuno, D., Tardin, C., Schmidt, C.F., and Mackintosh, F.C. (2007). Nonequilibrium  
539 mechanics of active cytoskeletal networks. *Science* 315, 370-373.
- 540 Munjal, A., Philippe, J.-M., Munro, E., and Lecuit, T. (2015). A self-organized  
541 biomechanical network drives shape changes during tissue morphogenesis.  
542 *Nature* 524, 351-355.
- 543 Munro, E., Nance, J., and Priess, J.R. (2004). Cortical flows powered by  
544 asymmetrical contraction transport PAR proteins to establish and maintain  
545 anterior-posterior polarity in the early *C. elegans* embryo. *Dev Cell* 7, 413-424.
- 546 Murrell, M.P., and Gardel, M.L. (2012). F-actin buckling coordinates contractility  
547 and severing in a biomimetic actomyosin cortex. *Proc Natl Acad Sci USA* 109,  
548 20820-20825.
- 549 Murrell, M., Oakes, P.W., Lenz, M., and Gardel, M.L. (2015). Forcing cells into  
550 shape: the mechanics of actomyosin contractility. *Nat Rev Mol Cell Biol*.
- 551 Nakamura, M., Chen, L., Howes, S.C., Schindler, T.D., Nogales, E., and Bryant, Z.  
552 (2014). Remote control of myosin and kinesin motors using light-activated  
553 gearshifting. *Nature Nanotechnology* 9, 693-697.
- 554 Nedelec, F.J., Surrey, T., Maggs, A.C., and Leibler, S. (1997). Self-organization of  
555 microtubules and motors. *Nature* 389, 305-308.
- 556 Nedelec, F., and Foethke, D. (2007). Collective Langevin dynamics of flexible  
557 cytoskeletal fibers. *New Journal of Physics* 9, 499-510.
- 558 Needleman, D., and Brugués, J. (2014). Determining physical principles of

- 559 subcellular organization. *Dev Cell* 29, 135-138.
- 560 Nishikawa, M., Naganathan, S.R., Jülicher, F., and Grill, S.W. (2017). Controlling  
561 contractile instabilities in the actomyosin cortex. *Elife* 6.
- 562 Oelz, D.B., Rubinstein, B.Y., and Mogilner, A. (2015). A Combination of Actin  
563 Treadmilling and Cross-Linking Drives Contraction of Random Actomyosin Arrays.  
564 *Biophys J* 109, 1818-1829.
- 565 Patel, S.R. (2005). Differential roles of microtubule assembly and sliding in  
566 proplatelet formation by megakaryocytes. *Blood* 106, 4076-4085.
- 567 Prost, J., Jülicher, F., and Joanny, J.F. (2015). Active gel physics. *Nat Phys* 11, 111-  
568 117.
- 569 Reymann, A.-C., Boujemaa-Paterski, R., Martiel, J.-L., Guérin, C., Cao, W., Chin,  
570 H.F., La Cruz, De, E.M., Théry, M., and Blanchoin, L. (2012). Actin network  
571 architecture can determine myosin motor activity. *Science* 336, 1310-1314.
- 572 Salbreux, G., Charras, G., and Paluch, E. (2012). Actin cortex mechanics and  
573 cellular morphogenesis. *Trends in Cell Biology* 22, 536-545.
- 574 Sanchez, T., Welch, D., Nicastro, D., and Dogic, Z. (2011). Cilia-Like Beating of  
575 Active Microtubule Bundles. *Science* 333, 456-459.
- 576 Sanchez, T., Chen, D.T.N., DeCamp, S.J., Heymann, M., and Dogic, Z. (2012).  
577 Spontaneous motion in hierarchically assembled active matter. *Nature* 491, 431-  
578 434.
- 579 Shah, E.A., Keren, K., and Balasubramanian, M. (2014). Symmetry breaking in  
580 reconstituted actin cortices. *Elife* 3.
- 581 Solon, J., Kaya-Copur, A., Colombelli, J., and Brunner, D. (2009). Pulsed forces  
582 timed by a ratchet-like mechanism drive directed tissue movement during dorsal  
583 closure. *Cell* 137, 1331-1342.
- 584 Surrey, T., Nedelec, F., Leibler, S., and Karsenti, E. (2001). Physical properties  
585 determining self-organization of motors and microtubules. *Science* 292, 1167-  
586 1171.
- 587 Takiguchi, K. (1991). Heavy meromyosin induces sliding movements between  
588 antiparallel actin filaments. *J Biochem* 109, 520-527.
- 589 Thoresen, T., Lenz, M., and Gardel, M.L. (2011). Reconstitution of Contractile  
590 Actomyosin Bundles. *Biophysical Journal* 100, 2698-2705.

- 591 Varga, V., Helenius, J., Tanaka, K., Hyman, A.A., Tanaka, T.U., and Howard, J.  
592 (2006). Yeast kinesin-8 depolymerizes microtubules in a length-dependent  
593 manner. *Nat Cell Biol* 8, 957–962.
- 594 Verkhovsky, A.B., and Borisy, G.G. (1993). Non-sarcomeric mode of myosin II  
595 organization in the fibroblast lamellum. *J Cell Biol* 123, 637–652.
- 596 Vogel, S.K., Petrasek, Z., Heinemann, F., and Schwille, P. (2013). Myosin motors  
597 fragment and compact membrane-bound actin filaments. *Elife* 2, e00116.
- 598 Weisenberg, R.C., and Cianci, C. (1984). ATP-induced gelation--contraction of  
599 microtubules assembled in vitro. *J Cell Biol* 99, 1527–1533.
- 600 Wolff, L., and Kroy, K. (2012). Minimal model for the inelastic mechanics of  
601 biopolymer networks and cells. *Phys Rev E Stat Nonlin Soft Matter Phys* 86,  
602 040901.
- 603 Ziebert, F., Vershinin, M., Gross, S.P., and Aranson, I.S. (2009). Collective alignment  
604 of polar filaments by molecular motors. *Eur Phys J E Soft Matter* 28, 401–409.
- 605 Ziebert, F., Aranson, I.S., and Tsimring, L.S. (2007). Effects of cross-links on motor-  
606 mediated filament organization. *New Journal of Physics* 9, 421–421.

607

## 608 **Figure 1: Elements of the theory**

609 **(A)** Networks are composed of polar filaments that may bend, and connectors  
610 containing two subunits through which they can bridge two nearby filaments.

611 **(B)** Subunits may be minus-end or plus-end directed motors that can bind  
612 anywhere to a filament, binders that can bind to any location along a filament, or  
613 end-binders that attach only at the minus or the plus ends of filaments.

614 **(C, D)** To predict the behavior of a network, previous theories have considered a  
615 pair of filaments with a single connector between them, while the theory  
616 considered here is based on the effects that connectors bound to a single filament  
617 have on the rest of the network.

618 (E) Pairs of connectors may generate local stress in the network depending on  
619 how the subunits move relative to one another on the filament. If the initial  
620 distance  $a_0$  between the subunits is maintained, the network does not deform.  
621 Local contraction is expected if the connectors move towards each other ( $a < a_0$ )  
622 and expansion may occur if they move apart ( $a > a_0$ ). If the filament is flexible,  
623 however, the expansile stress can be reduced if the filament buckles.

624

625 **Figure 2: Predictions and simulations for actin-like networks of flexible**  
626 **filaments.**

627 (A) A system composed of flexible filaments and two types of connectors:  
628 crosslinkers and bivalent motors. The table lists the four possible configurations  
629 for two connectors bound to a filament, the relative movement of the connectors  
630 ( $\frac{da}{dt}$ ), the likelihood, and the mechanical nature of each configuration. The  
631 likelihoods are combinations of  $P_M$  and  $P_C$ , i.e. the probabilities of having a motor  
632 or a crosslinker at an intersection of two filaments (see Supplemental Information  
633 D3).

634 (B) The evolution of a simulated random network composed of 1500 flexible  
635 filaments (bending rigidity =  $0.01 \text{ pN } \mu\text{m}^2$ ) and 12000 connectors of each type,  
636 distributed over a circular area of radius  $15 \mu\text{m}$ .

637 (C) The contraction rate of a simulated network as a function of the ratio of  
638 crosslinkers to motors, with the total number of connectors kept constant. Each

639 symbol indicates the result of one simulation. The broken line indicates the  
640 analytical prediction made by the theory (Supplemental Information D).

641 **(D)** Snapshots at  $t=15s$  of networks similar to **(B)** containing varying numbers of  
642 motors (vertical axis) and crosslinkers (horizontal axis). No contraction occurs  
643 without crosslinkers or without motors, and the optimal contractile rate is  
644 obtained here for 8000 motors and 10000 crosslinkers. The location of the  
645 optimum can be predicted from the molecular properties of the connectors  
646 (Supplemental Information D).

647 **Figure 3: Elements of the stochastic model of cytoskeletal dynamics.**

648 **(A)** Networks of flexible filaments are simulated using a Brownian dynamics  
649 method. In brief, filaments are polar, thin and have a constant length. Each  
650 filament is modeled with an oriented string of points, defining segments of equal  
651 lengths. The movement of filament points follows Brownian dynamics, with elastic  
652 forces such as the bending elasticity of the filament, and the elasticity of  
653 connectors.

654 **(B)** In the simulations, connecting molecules are made of two independent  
655 filament-binding subunits (a and b, which can be any one of those defined in Fig.  
656 1B). When both subunits are unattached to filaments, the molecule diffuses within  
657 the simulation space.

658 **(C)** Binding occurs at a constant rate  $k_{on}$  to any filament closer to than  $\epsilon$ .  
659 Attachment occurs on the closest point of the filament.

660 **(D)** End-binding follows the same rules as binding, but is restricted to a distance  $\delta$   
661 from the targeted filament end.

662 **(E)** Connectors act mechanically as Hookean springs between two filaments, with  
663 stiffness  $k$  and zero resting length.

664 **(F)** Motor subunits move towards either the plus- or minus-end of the filament with  
665 a linear force-velocity relationship.

666 **(G)** All connector subunits detach with a force-independent rate  $k_{off}$ , and motors  
667 detach immediately upon reaching a filament end.

668

669 **Figure 4: Predictions and simulations for microtubule-like networks of rigid**  
670 **filaments.**

671 **(A)** A system composed of rigid filaments and two types of connectors. One  
672 connector consists of a plus-end directed motor combined with a minus-end  
673 binder, the other is a plus-end directed motor combined with a plus-end binder.  
674 There are four possible configurations involving these two connectors.

675 **(B)** Three time points on the evolution of an expansile network of 1500 straight  
676 filaments (their bending rigidity is set as "infinite" here) with 1500 motor-plus-end  
677 binders and 48000 motor-minus-end binders initially distributed over a circular  
678 area of radius  $15\mu\text{m}$ .

679 **(C)** Three time points on the evolution of a network similar as **(B)**, but with 48000  
680 motor-plus-end binders and 1500 motor-minus-end binders.

681 **(D)** The contraction rate of a network as a function of the number of connectors,  
682 which are inversely varied. Each symbol represents a simulated random network  
683 of 4000 straight filaments initially distributed over a circular area of radius 25 $\mu$ m.  
684 Details of methods as in Fig. 2C. The broken line indicates the analytical  
685 prediction made by the theory (Supplemental Information F).

686

687 **(E)** Simulations of networks containing varying numbers of connectors. Networks  
688 contain 1500 filaments initially distributed over a radius of 15 $\mu$ m. Depending on  
689 the concentrations of the connectors, the network can be expansile (top left  
690 corner) or contractile (bottom right corner). Snapshots at t=30s.

691

## 692 **Figure 5: Additional predictions of the theory**

693 The predictions of the theory for the various conditions shown here are  
694 represented graphically as sets of green centripetal arrows for contraction, red  
695 centrifugal arrows for expansion, and grey squares for neutral networks.

696 **(A)** Examples of simulations of networks with the indicated types of connectors.

697 The predicted outcomes of network contraction, expansion or neutrality (symbol  
698 at the top left of each simulation) are confirmed by the behavior of the network in  
699 simulations in each case. The networks are composed of 1500 flexible or rigid  
700 filaments, and 24000 connectors. Snapshots at t=20s.

701 **(B)** Summary of the predictions for random networks with all possible  
702 combinations of all possible types of connectors, either with flexible (bending  
703 rigidity =  $0.01 \text{ pN } \mu\text{m}^2$ , below diagonal) or rigid filaments (straight filaments,  
704 above diagonal). The networks contain 4000 filaments and 64000 connectors at a  
705 1:1 ratio. The labels of the rows and columns of the table indicate the type of the  
706 two connectors that are mixed.

707 **(C)** Comparison of the contraction rates predicted by the theory (horizontal axis)  
708 with the rates obtained by simulation (vertical axis). Each data point indicates one  
709 of the 210 systems considered in **(B)**. Networks are made of 4000 filaments and  
710 64000 connectors initially distributed over a circular area of radius  $25\mu\text{m}$ . In this  
711 case, all the binding parameters of the subunits and the concentration of  
712 connectors are always equal, such that the prediction is simplified (Supplemental  
713 Information E).

714

## 715 **Figure 6: Heterogeneous and pulsatile systems**

716 **(A)** Configurations present in a heterogeneous network containing rigid  
717 minifilaments and flexible actin-like filaments. The motors are permanently  
718 attached at the extremities of the minifilaments, such as to represent myosin  
719 minifilaments. The system is predicted to be contractile in the presence of passive  
720 crosslinkers connecting actin filaments directly, and neutral without crosslinkers.

721 **(B)** Detail of a simulation with minifilaments (green) and crosslinkers (blue).



722 (C, D) The simulated systems contract with crosslinkers, but not when they are  
723 omitted.

724 (E) Time series of a simulation with filament turnover, 1400 filaments (rigidity  
725  $0.075 \text{ pN } \mu\text{m}^2$ ), 22400 motors, 5600 crosslinkers within periodic boundary  
726 conditions with size  $16 \mu\text{m}$ . Filament turnover was implemented by deleting a  
727 randomly selected filament and placing a new filament at a random location,  
728 stochastically with a rate  $R=64\text{s}^{-1}$ , corresponding to an average filament lifetime of  
729  $\sim 21.8\text{s}$ . The series shows the formation of a new contractile spot at the right side  
730 (black arrowhead) and its downward movement and fusion with the contractile  
731 spot at the lower right corner of the panels (green arrowheads).

732 (F) The local density of filaments in an arbitrarily chosen region covering  $\sim 6\%$  of  
733 the simulated space as a function of time. The data with filament lifetime  $21.8\text{s}$  are  
734 from the simulation shown in (A). The network continues to redistribute, showing  
735 irregular variations of the local filament density, and does not contract into one  
736 spot.

737

### 738 **Figure 7: Review of contractile and expansile mechanisms**

739 Previously described mechanisms can be considered by focusing on pairs of  
740 connectors present on filaments. The sarcomeric (A) and the analogous  
741 mechanism involving bipolar filaments (B) have a barbed-end directed multivalent  
742 motor acting on filaments that are connected at their pointed ends by molecular

743 complexes that act as connectors. These systems are always contractile because  
744 there are only two active configurations: one involving two motors, which is  
745 neutral, and one with a motor and an end-binder, which is contractile since the  
746 motor always moves towards the end binder.

747 The buckling-dependent mechanism (C) leads to contractility because the  
748 flexibility of the filament spoils the expansile configuration. Thus, if the filaments  
749 are sufficiently flexible, the net effect will be contractile (see Fig. 2).

750 In systems containing only end-dwelling multivalent motors (D), the motors  
751 generate contraction without added passive connectors, because they eventually  
752 come to a halt at the end of the filament and thereby act as end-binding  
753 connectors. Configurations involving a motor halted at the end, and a motor  
754 moving towards this end along the same filament result in contraction. Note that  
755 since in this mechanism no configuration is expansile, and the net effect is always  
756 contractile, irrespective of filament buckling.

757 A connector with a subunit that binds to a disassembling end of a filament (E)  
758 generates only one active configuration which is always contractile, even in the  
759 absence of motors. In this example, the end-tracker binds to the barbed end, and  
760 moves towards the pointed end by tracking a depolymerizing end (or inducing its  
761 disassembly).

762 (F) A mitotic spindle at anaphase may be considered as a network held together  
763 by multivalent plus-end directed motors from the Kinesin5 family, and by factors

764 connecting the microtubule minus ends at the spindle pole. With these two types  
765 of connectors, the configurations involving two connectors are neutral, passive, or  
766 expansile.

767 **(G)** A system can be made expansile by the “antenna effect”, because motors  
768 acquire an asymmetric distribution profile along the filaments. In the presence of  
769 this effect, contractile configurations are less likely than expansile ones, and the  
770 overall system can become expansile as a consequence.

771 **(H)** Some mechanisms of contraction involve two connectors acting on more than  
772 one filaments. In the case depicted here, two crossing filaments will be “zippered  
773 together”, by a pair of connectors moving apart. This configuration is able to  
774 create a contractile force dipole in the direction perpendicular to the filaments.

775

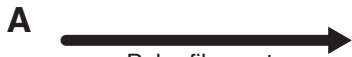

Polar filament  
(e.g. actin, microtubule)

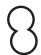

Connectors  
(e.g. myosins, kinesins, dyneins  
cross-linkers, Arp2/3)

**B**

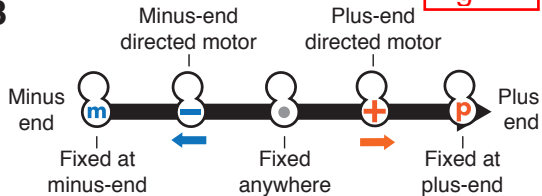

**C**

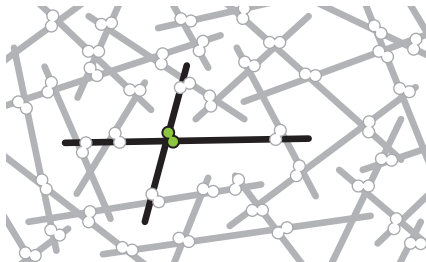

**D**

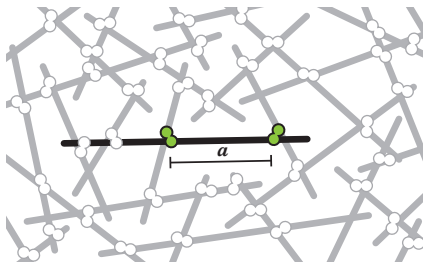

**E**

Neutral

Contraction

Expansion  
*rigid filament*

Spoiled expansion  
*flexible filament*

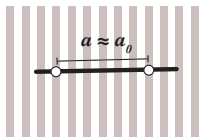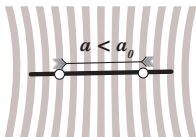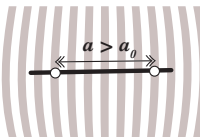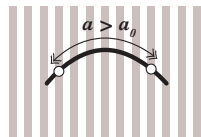

**A** Components:  +  + flexible filaments

| Configuration                                                                    | $da/dt$ | Probability         | Effect     |
|----------------------------------------------------------------------------------|---------|---------------------|------------|
|  | 0       | $P_c^2$             | static     |
|  | 0       | $P_M^2 (1 - P_c)^2$ | neutral    |
|  | -v      | $P_M (1 - P_c) P_c$ | pulling    |
|  | +v      | $P_M (1 - P_c) P_c$ | (buckling) |

Net outcome: contraction

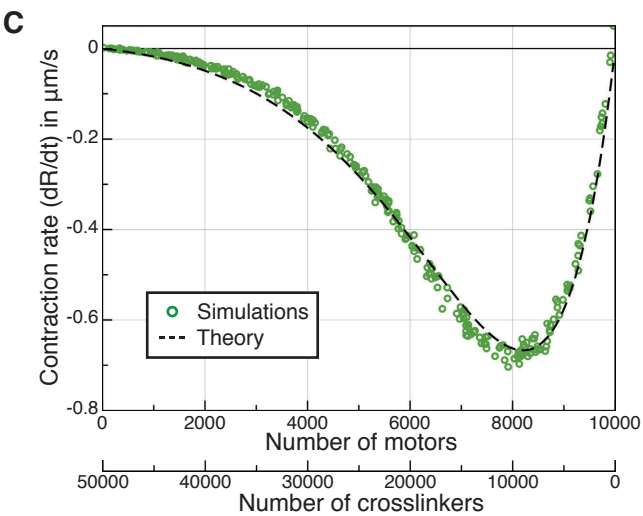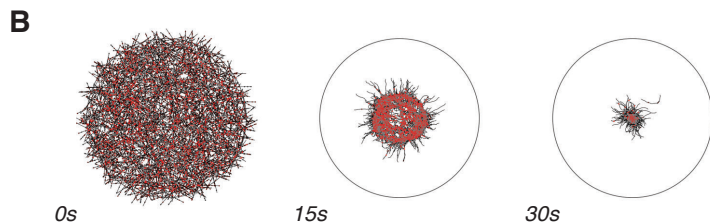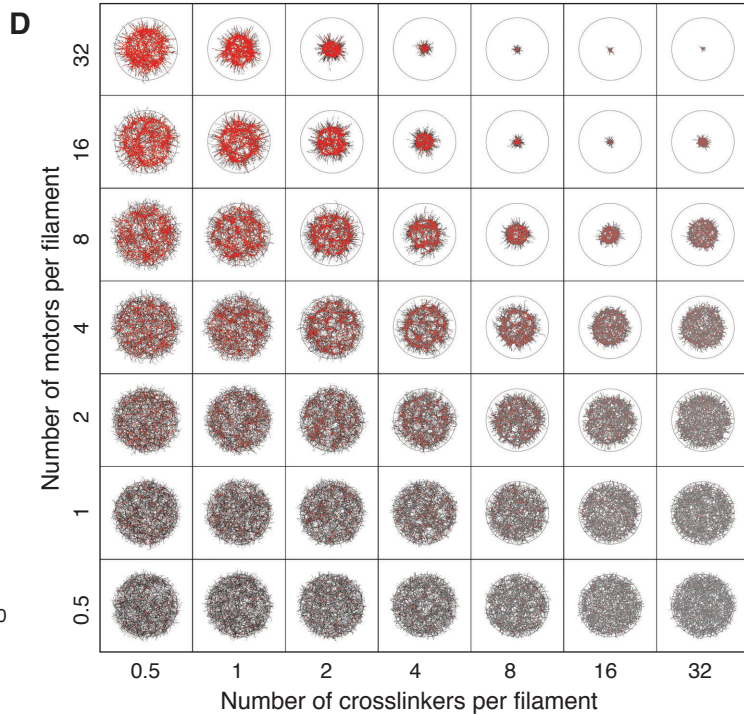

**Fig. 3**

**A Filaments**

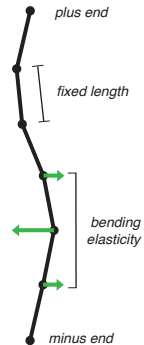

**B Diffusion**

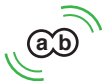

**C Binding**

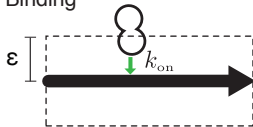

**D End-binding**

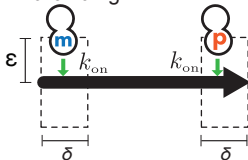

**E Linking**

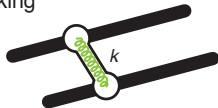

**F Movement**

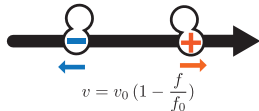

**G Unbinding**

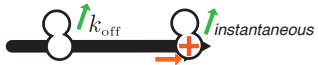

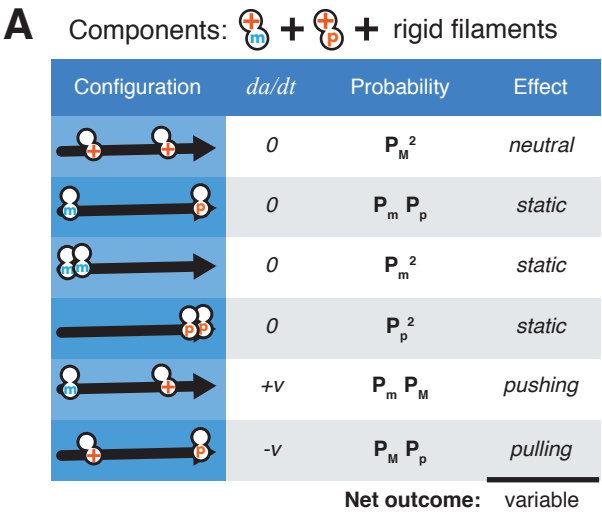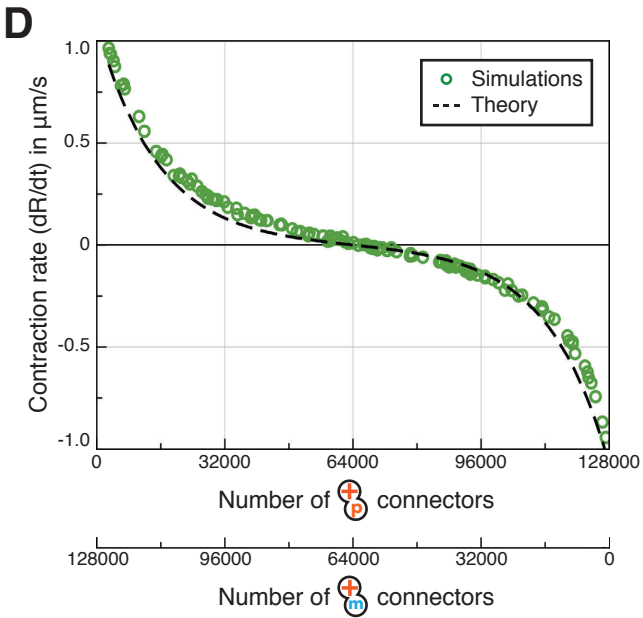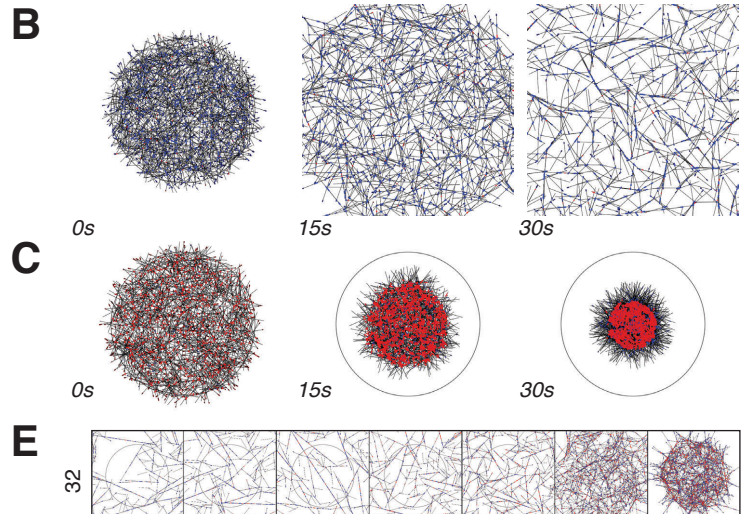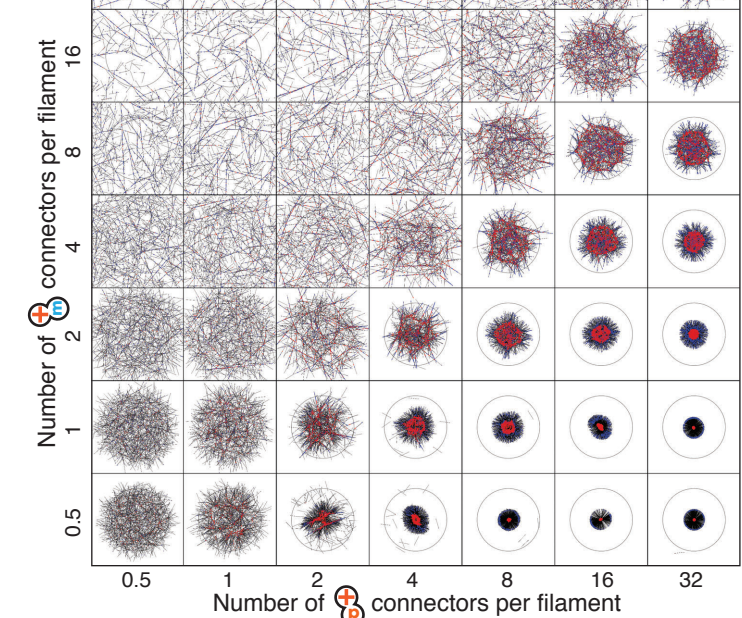



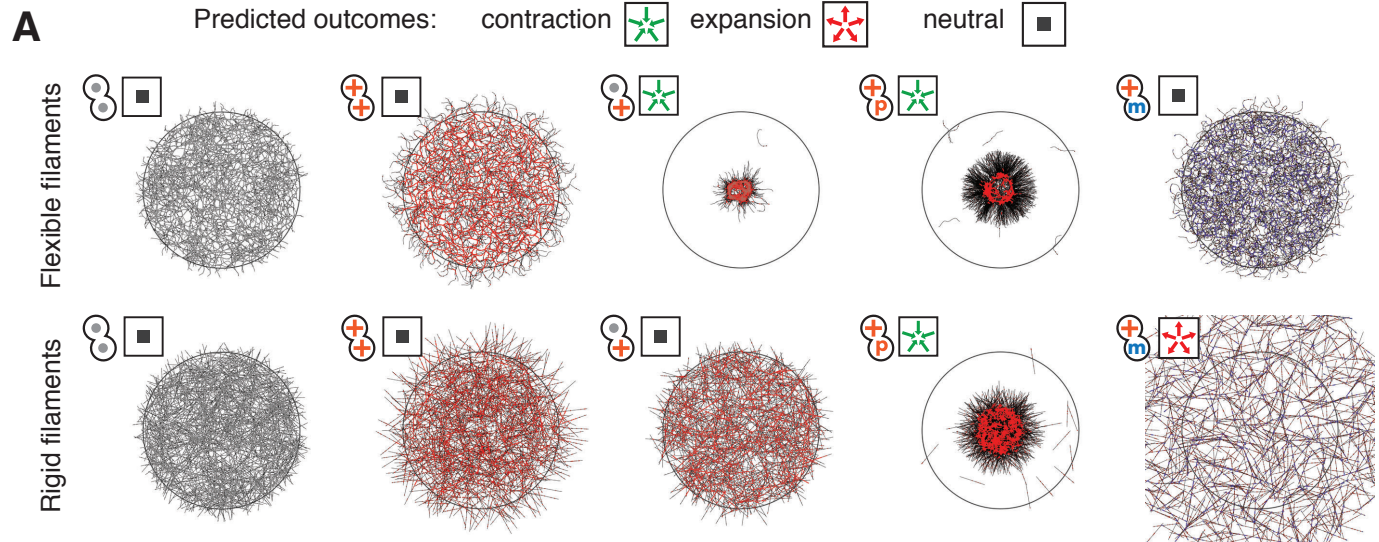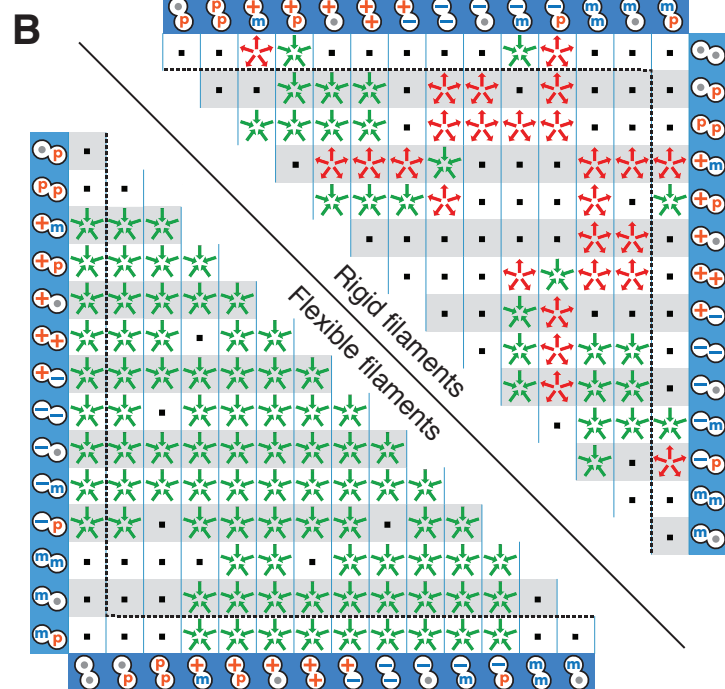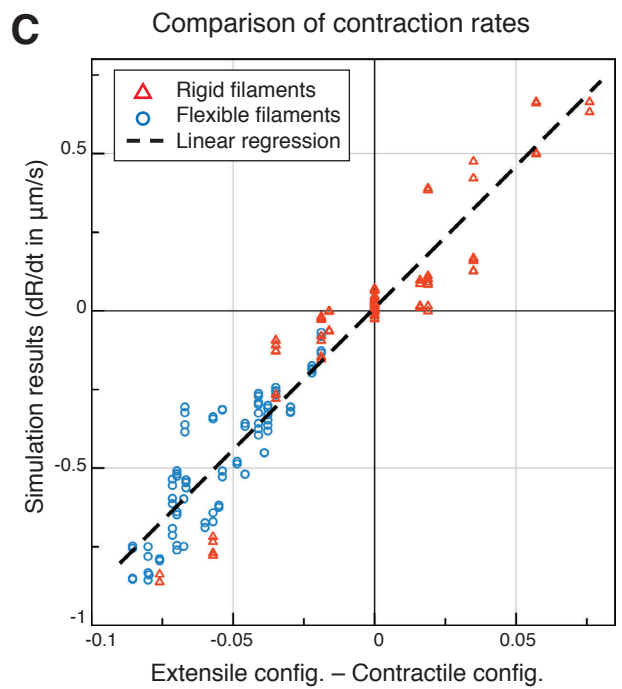



**A** Components:  +   
 + flexible filaments

| Configuration                                                                    | $da/dt$ | Probability         | Effect             |
|----------------------------------------------------------------------------------|---------|---------------------|--------------------|
|  | 0       | 1                   | static             |
|  | 0       | $P_M^2 (1 - P_C)^2$ | neutral            |
|  | 0       | $P_C^2$             | static             |
|  | -v      | $P_M (1 - P_C) P_C$ | pulling            |
|  | +v      | $P_M (1 - P_C) P_C$ | (buckling)         |
| <b>Net outcome:</b>                                                              |         |                     | <b>contractile</b> |

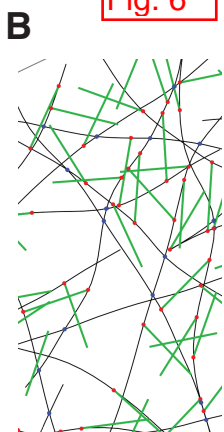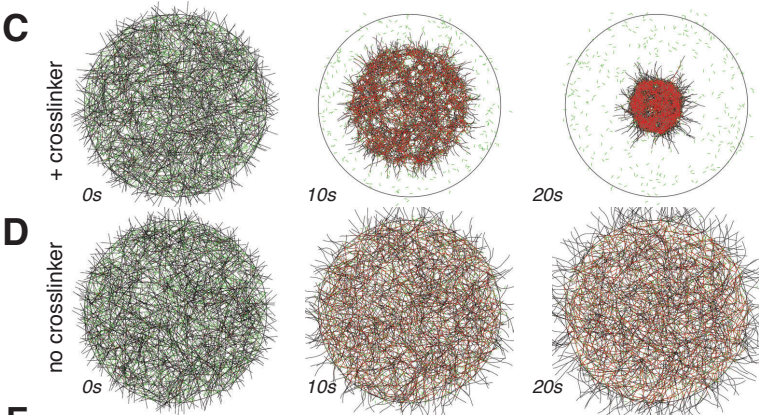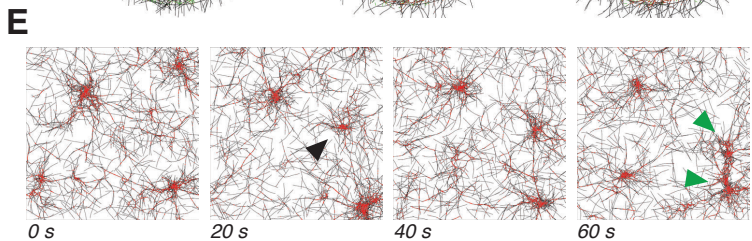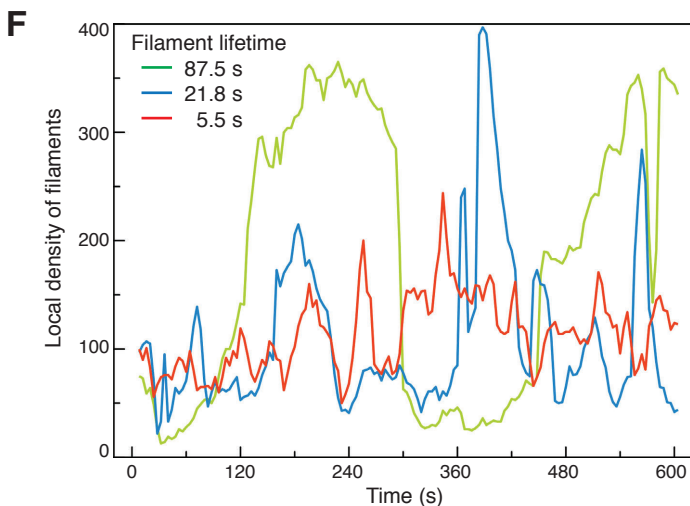

**mechanisms**

**connectors**

**configurations**

**A Sarcomeric**

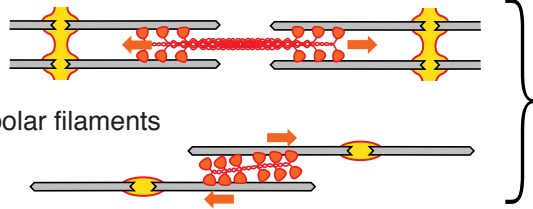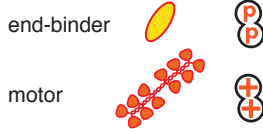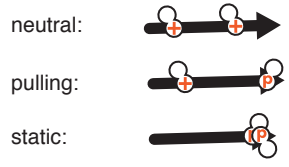

**B Bipolar filaments**

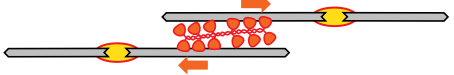

**C Dependent on buckling**

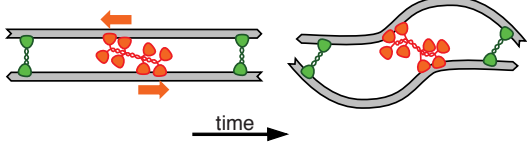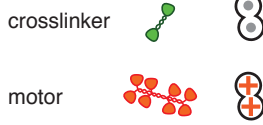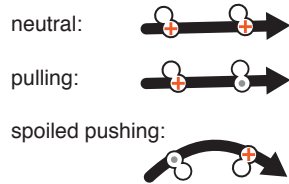

**D End-dwelling multivalent motors**

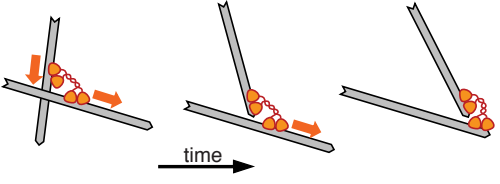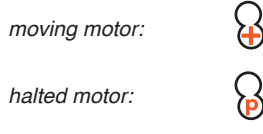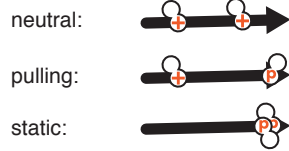

**E Filament disassembly**

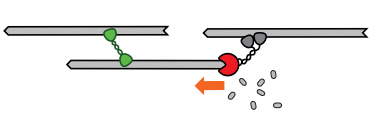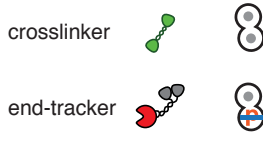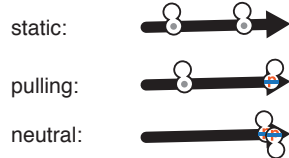

**F Mitotic spindle elongation**

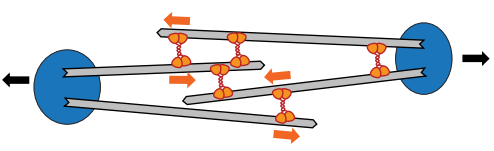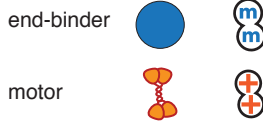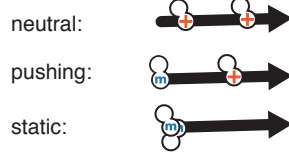

**G Possible extension mechanism for disorganized networks**

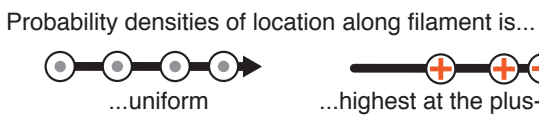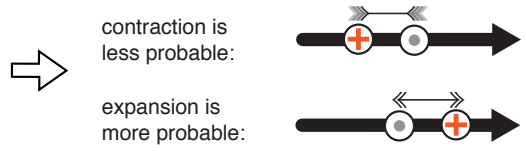

**H Zippering pair of connectors**

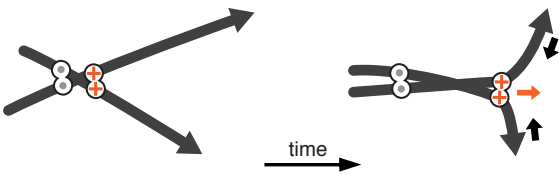

Source: http://www.biorxiv.org/content/10.1101/138537v1.full.pdf
